# Supplementary material
Source: Springer Nature journal article supplement (https://www.springermedizin.de/resource/supplementary/12904_2013_161_MOESM4_ESM.pdf/9517670)
Supplement: MOESM4 [file 9517670]

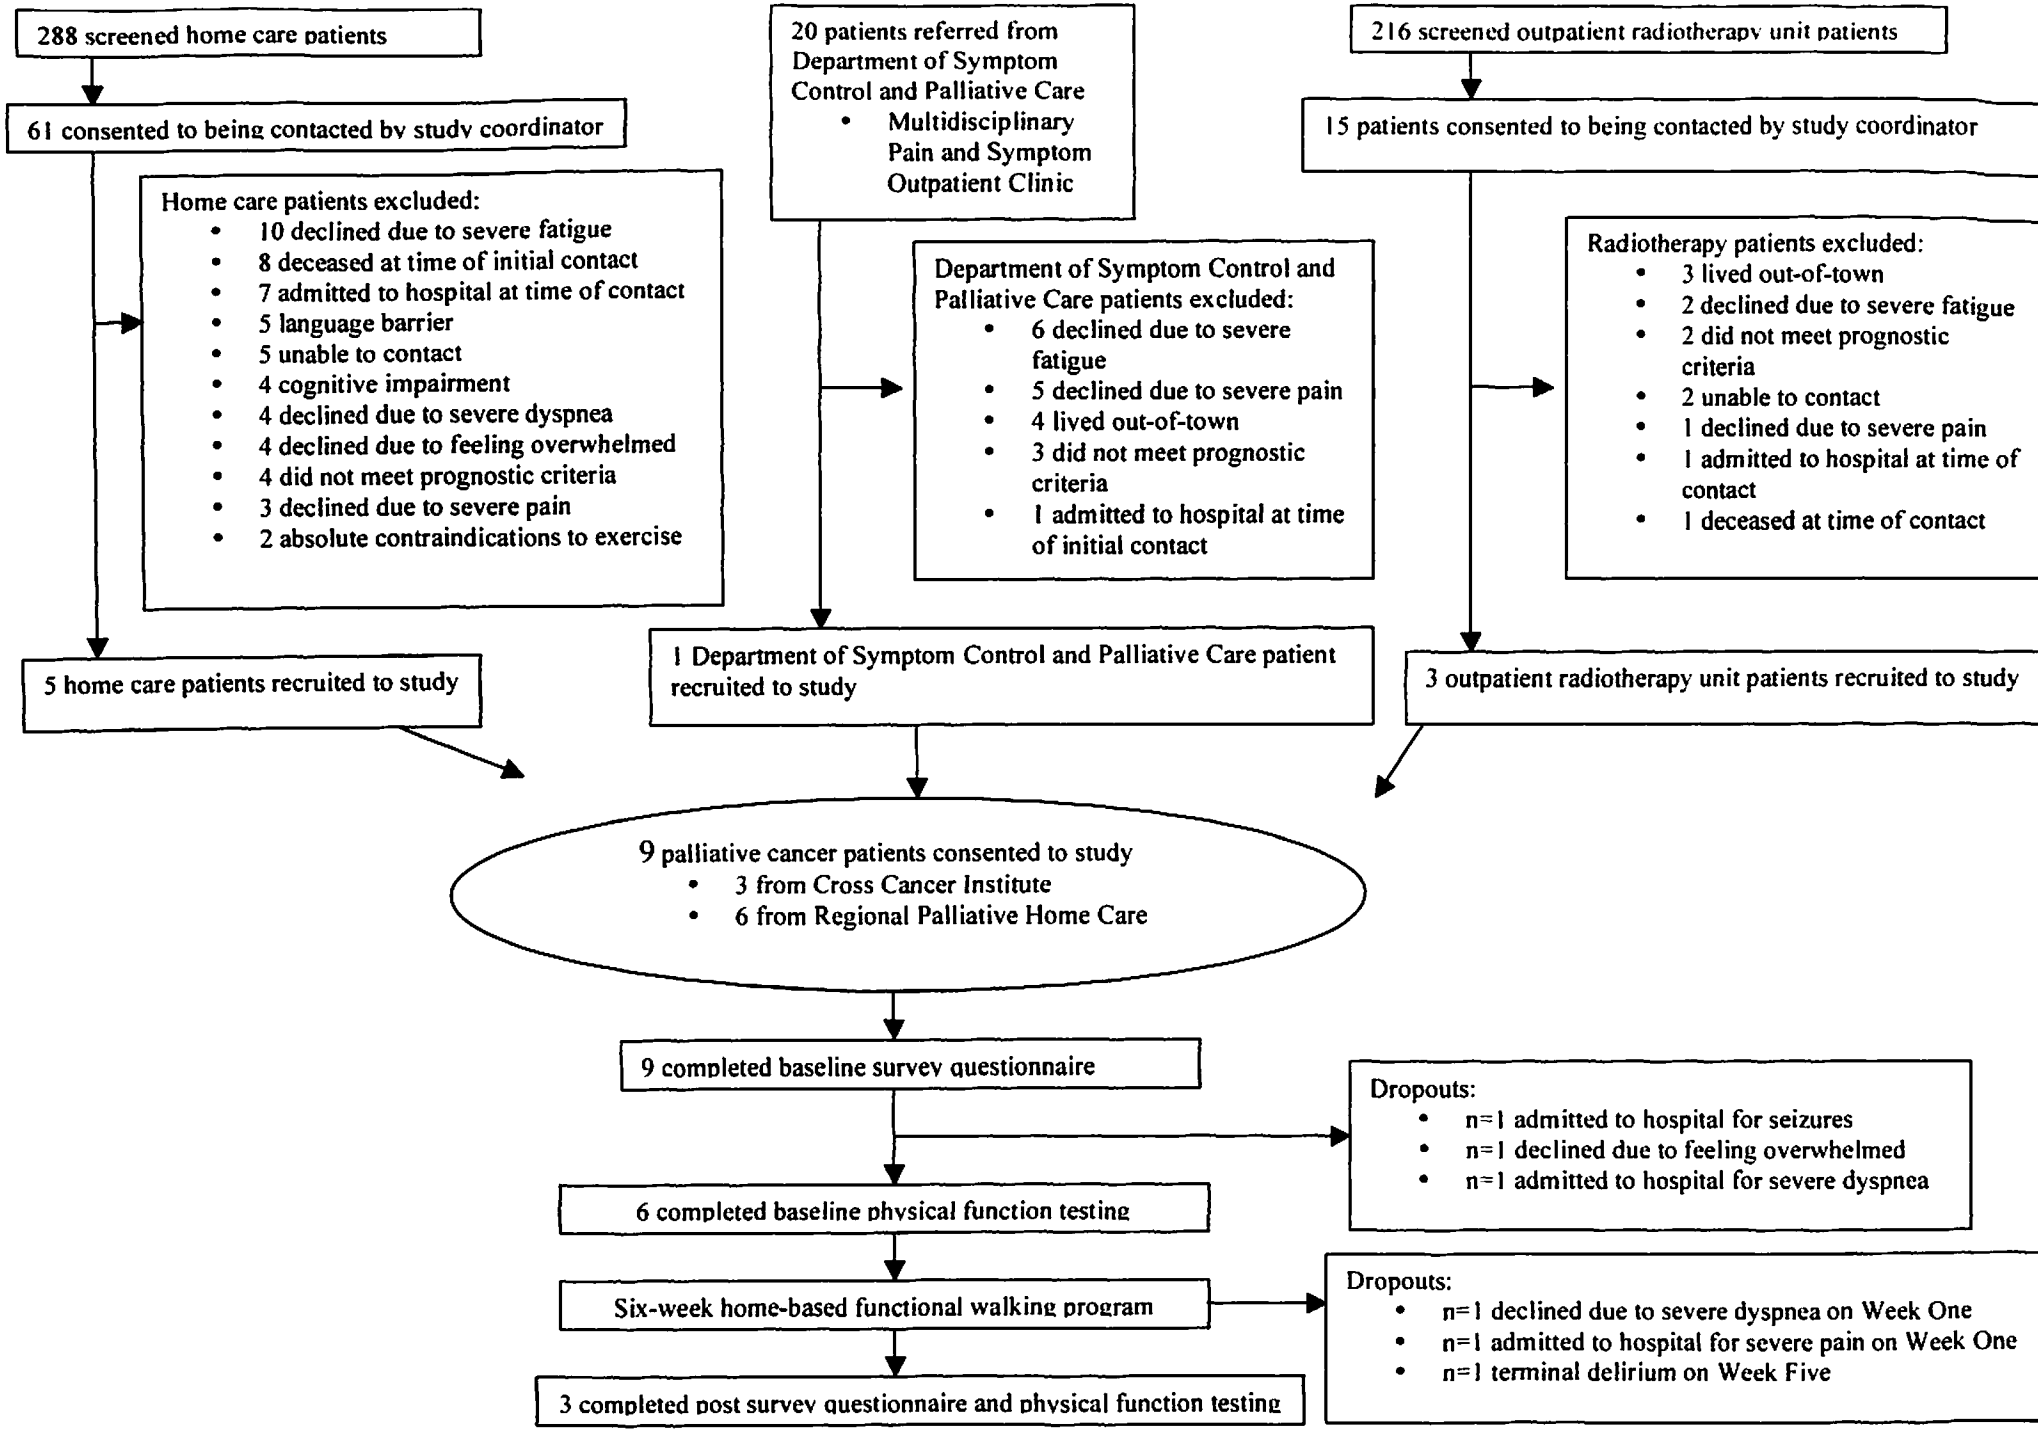

**Table 1: Outcome Measures for Case Participants**

| Outcome Measure             | Assessment                                  | Case #1     |             | Case #2     |            | Case #3     |             |
|-----------------------------|---------------------------------------------|-------------|-------------|-------------|------------|-------------|-------------|
|                             |                                             | Baseline    | Post        | Baseline    | Post       | Baseline    | Post        |
| 1. MQOL                     | Physical Symptoms (0-10)                    | 6.0         | 5.5         | 7.2         | 8.3        | 7.0         | 5.0         |
|                             | Physical Well-Being (0-10)                  | 7.0         | 6.0         | 9.0         | 9.0        | 5.0         | 4.0         |
|                             | Psychological (0-10)                        | 10.0        | 10.0        | 9.4         | 9.3        | 10.0        | 9.5         |
|                             | Existential (0-10)                          | 9.6         | 9.7         | 10.0        | 10.0       | 9.3         | 6.7         |
|                             | Support (0-10)                              | 10.0        | 10.0        | 10.0        | 10.0       | 8.5         | 9.0         |
|                             | <b>TOTAL SCORE (0-10)</b>                   | <b>8.5</b>  | <b>8.2</b>  | <b>9.1</b>  | <b>9.3</b> | <b>8.0</b>  | <b>6.8</b>  |
| 2. LLFDI                    | Upper Extremity Functioning (0-25)          | 0           | 9.0         | 5.0         | 0          | 14.0        | 20.0        |
|                             | Basic Lower Extremity Functioning (0-25)    | 3.0         | 6.0         | 6.5         | 0          | 5.0         | 14.0        |
|                             | Advanced Lower Extremity Functioning (0-25) | 9.0         | 17.0        | 5.0         | 5.0        | 8.0         | 21.0        |
|                             | <b>TOTAL SCORE (0-75)</b>                   | <b>12.0</b> | <b>32.0</b> | <b>16.5</b> | <b>5.0</b> | <b>27.0</b> | <b>55.0</b> |
| 3. ESAS                     | Pain (0-10)                                 | 2.0         | 2.0         | 0           | 1.0        | 3.0         | 4.0         |
|                             | Fatigue (0-10)                              | 4.0         | 3.0         | 4.0         | 3.0        | 4.0         | 7.0         |
|                             | Nausea (0-10)                               | 0.5         | 0           | 0           | 4.0        | 0           | 7.0         |
|                             | Depression (0-10)                           | 0           | 0           | 0           | 0          | 0           | 0           |
|                             | Anxiety (0-10)                              | 0           | 0           | 0           | 2.5        | 0           | 0           |
|                             | Drowsiness (0-10)                           | 0           | 0           | 0           | 0          | 1.0         | 6.0         |
|                             | Appetite (0-10)                             | 0           | 5.0         | 0           | 3.0        | 1.0         | 10.0        |
|                             | Well-Being (0-10)                           | 0           | 3.0         | 0           | 2.0        | 2.0         | 4.0         |
|                             | Dyspnea (0-10)                              | 0           | 0           | 0           | 0          | 1.0         | 3.0         |
| 4. BFI                      | TOTAL Global Fatigue (0-10)                 | 2.0         | 4.8         | 0.1         | 2.3        | 2.0         | 6.9         |
| 5. HDS                      | Authentic Spirit Factor (1-7)               | 1.0         | 1.0         | 1.0         | 1.0        | 1.2         | 2.0         |
|                             | Comfort Factor (1-7)                        | 3.3         | 3.3         | 2.5         | 3.3        | 2.0         | 3.5         |
| 6. Physical parameters      | Height (m)                                  | 1.6         | 1.6         | 1.6         | 1.6        | 1.6         | 1.6         |
|                             | Weight (kg)                                 | 158.8       | 150.1       | 84.9        | 82.5       | 59.1        | 60.1        |
|                             | BMI (kg/m2)                                 | 55.8        | 59.0        | 34.0        | 33.0       | 23.7        | 24.1        |
|                             | Resting Blood Pressure (mm Hg)              | 138/80      | 112/72      | 122/76      | 106/80     | 148/80      | 132/90      |
|                             | Resting Heart Rate (bpm)                    | 86          | 83          | 93          | 88         | 84          | 108         |
| 7. 8-Foot up-and-go         | Number of seconds required                  | 12.4        | 14.0        | 5.81        | 5.44       | 8.41        | 10.0        |
| 8. Chair sit-and-reach      | Left (number of centimeters)                | -30.0       | -15.0       | +1.0        | +1.0       | 0           | -12.0       |
|                             | Right (number of centimeters)               | -33.0       | -15.0       | +2.0        | +2.0       | 0           | -11.0       |
| 9. Arm curl                 | Left (number of repetitions)                | 15          | 12          | 15          | 15         | 18          | 11          |
|                             | Right (number of repetitions)               | 16          | 12          | 13          | 17         | 14          | 10          |
| 10. Back scratch            | Left (number of centimeters)                | -24.0       | -31.0       | +2.0        | +0.5       | -27.0       | -30.0       |
|                             | Right (number of centimeters)               | -29.0       | -32.0       | +3.0        | +2.0       | -24.5       | -24.0       |
| 11. Grip strength           | Left (kg·feet)                              | 32.0        | 34.0        | 24.3        | 24.5       | 34.0        | 25.5        |
|                             | Right (kg·feet)                             | 31.8        | 31.8        | 32.0        | 31.0       | 16.0        | 17.0        |
| 12. 30 second chair stand   | Number of repetitions                       | 10          | 8           | 13          | 17         | 15          | 11          |
| 13. Four test balance scale | Feet together (number of seconds)           | 10.0        | 10.0        | 10.0        | 10.0       | 10.0        | 10.0        |
|                             | Semi-tandem (number of seconds)             | 10.0        | 10.0        | 10.0        | 10.0       | 10.0        | 10.0        |
|                             | Tandem (number of seconds)                  | 10.0        | 0           | 10.0        | 10.0       | 10.0        | 2.0         |
|                             | One leg stand (number of seconds)           | 2.81        | 0           | 10.0        | 10.0       | 4.0         | 0           |
| 14. 6-minute walk           | Total distance (m)                          | 264.0       | 162.4       | 467.4       | 488.7      | 320.0       | 250.9       |

## Appendix 1: Modified home-based functional walking (FW) program

|     | Exercise                             | Purpose                              | Target muscle / joint                            | Examples of equipment                          | Position            |
|-----|--------------------------------------|--------------------------------------|--------------------------------------------------|------------------------------------------------|---------------------|
| 1.  | Chin to chest                        | Range of motion                      | Cervical spine                                   | None                                           | Seated              |
| 2.  | Chin to shoulder                     | Range of motion                      | Cervical spine                                   | None                                           | Seated              |
| 3.  | Shoulder shrugs                      | Range of motion                      | Shoulder joint                                   | None                                           | Seated              |
| 4.  | Arm swing                            | Range of motion                      | Shoulder joint                                   | None                                           | Seated              |
| 5.  | Rowing                               | Range of motion                      | Shoulder and elbow joints                        | None                                           | Seated              |
| 6.  | Forward hugs                         | Range of motion                      | Lower back and upper arms                        | None                                           | Seated              |
| 7.  | Up and down leg march                | Range of motion                      | Hip joint                                        | None                                           | Seated or standing  |
| 8.  | Out and in leg march                 | Range of motion                      | Hip joint                                        | None                                           | Seated or standing  |
| 9.  | Foot forward and backward            | Range of motion                      | Knee joint                                       | None                                           | Seated or standing  |
| 10. | Toe point/flex and Wrist flex/extend | Range of motion                      | Ankle and wrist joints                           | None                                           | Seated              |
| 11. | Ball squeeze                         | Resistance training<br>Grip strength | Wrist and forearm muscles                        | Thera-band <sup>®</sup> hand exercisers        | Seated              |
| 12. | Chest press                          | Resistance training                  | Pectoralis major, triceps and deltoids           | Thera-bands <sup>®</sup>                       | Seated              |
| 13. | Rowing                               | Resistance training                  | Latissimus dorsi, trapezius, biceps and deltoids | Thera-bands <sup>®</sup>                       | Seated              |
| 14. | Biceps curl                          | Resistance training                  | Biceps                                           | Neoprene dumbbells                             | Seated              |
| 15. | Triceps curl                         | Resistance training                  | Triceps                                          | Thera-bands <sup>®</sup> or neoprene dumbbells | Seated              |
| 16. | Sit to stand                         | Resistance training                  | Quadriceps, hamstrings and gluteals              | None                                           | Seated and standing |
| 17. | Knee flexion                         | Resistance training                  | Hamstrings                                       | Ankle cuff weights                             | Seated or standing  |
| 18. | Toe raises                           | Balance retraining                   | Tibialis anterior                                | None                                           | Standing            |
| 19. | Heel raises                          | Balance retraining                   | Gastrocnemius and soleus                         | None                                           | Standing            |
| 20. | Swan                                 | Stretching                           | Pectoralis major, deltoids and biceps            | None                                           | Seated              |
| 21. | Zipper stretch                       | Stretching<br>Flexibility            | Latissimus dorsi and triceps                     | Thera-bands <sup>®</sup>                       | Seated or standing  |
| 22. | Tibia touch                          | Stretching<br>Flexibility            | Hamstrings and spinal erectors                   | None                                           | Seated              |
| 23. | Outer thigh stretch                  | Stretching                           | Hip abductors                                    | None                                           | Seated              |
| 24. | Quadriceps stretch                   | Stretching                           | Quadriceps and tibialis anterior                 | None                                           | Seated or standing  |
| 25. | Calf stretch                         | Stretching                           | Gastrocnemius and soleus                         | None                                           | Seated or standing  |

## **Appendix 2: Guidelines for the modified home-based functional walking (FW) program**

| <b>Program Components</b> | <b>General Guidelines</b>                                                                                                                                                                                                                                                                                                                                                                                                                                                                                                                                                                                                                                                                  |
|---------------------------|--------------------------------------------------------------------------------------------------------------------------------------------------------------------------------------------------------------------------------------------------------------------------------------------------------------------------------------------------------------------------------------------------------------------------------------------------------------------------------------------------------------------------------------------------------------------------------------------------------------------------------------------------------------------------------------------|
| 1. Muscle strengthening   | <p>Whole body resistance training with special emphasis on lower body muscle strengthening for transferring, standing, walking and prevention of falls</p> <p>Balanced resistance training of opposing muscle groups:</p> <ul style="list-style-type: none"><li>- Chest/back muscles</li><li>- Biceps/triceps</li><li>- Quadriceps/hamstrings</li><li>- Tibialis anterior/gastrocnemius and soleus</li></ul> <p>Maintenance of proper technique, breathing and positioning on range of motion prior to use of resistance equipment</p>                                                                                                                                                     |
| 2. Balance retraining     | <p>Whole body balance training with special emphasis on ankle dorsiflexors and plantar flexors for recovery of balance</p> <p>Maintenance of posture and balance using body weight alone prior to adding resistance equipment</p>                                                                                                                                                                                                                                                                                                                                                                                                                                                          |
| 3. Intensity              | <p>Goal of low to moderate intensity measured using Borg's ratings of perceived exertion (RPE) (0-10)</p>                                                                                                                                                                                                                                                                                                                                                                                                                                                                                                                                                                                  |
| 4. Resistance             | <p>Progression by:</p> <ul style="list-style-type: none"><li>• Supported to unsupported positions</li><li>• Range of motion or body weight to addition of resistance equipment</li><li>• Start with the lightest resistance equipment and upwards</li><li>• Increasing number of sets/repetitions prior to progression of resistance level</li></ul> <p>Reduce workload if:</p> <ul style="list-style-type: none"><li>• Increased pain, fatigue or shortness of breath post exercise</li><li>• Muscle pain or soreness &gt; 48 hours</li></ul> <p>Terminate session if:</p> <ul style="list-style-type: none"><li>• Excessive pain, fatigue or shortness of breath post exercise</li></ul> |
| 5. Sets                   | <p>Progression by:</p> <ul style="list-style-type: none"><li>• Start with one set of 8 repetitions per exercise</li><li>• <math>RPE \leq 3</math> consistent for <math>\geq 2</math> sessions prior to increasing number of repetitions by 2 until maximum of 15 repetitions per set</li><li>• Once one set of 15 repetitions achieved, advanced to two sets of 8 repetitions</li></ul>                                                                                                                                                                                                                                                                                                    |
| 6. Frequency              | <p>3 days per week, on non-consecutive days</p>                                                                                                                                                                                                                                                                                                                                                                                                                                                                                                                                                                                                                                            |

**Appendix 3: Objective Physical Function Measures (listed in the order of testing)**

| <b>Physical Function Test</b> | <b>Purpose</b>              | <b>General Description</b>                                                                                                                                      |
|-------------------------------|-----------------------------|-----------------------------------------------------------------------------------------------------------------------------------------------------------------|
| 1. 8-Foot up-and-go           | Agility and dynamic balance | Number of seconds required to get up from a seated position, walk 8 feet, turn and return to a seated position                                                  |
| 2. Chair sit-and-reach        | Lower body flexibility      | Number of centimeters between extended fingers and tip of toe, when leg extended and hands reaching towards toes from a seated position at the front of a chair |
| 3. Arm curl                   | Upper body strength         | Number of bicep curls completed in 30 seconds holding a hand weight (5 lbs for women, 8 lbs for men)                                                            |
| 4. Back scratch               | Upper body flexibility      | Number of centimeters between extended middle fingers, when one hand is reaching over the shoulder and the opposite hand up the middle of the back              |
| 5. Grip strength              | Hand and forearm strength   | Number of kilogram-feet measured on handheld dynamometer (average of 2 measurements per side)                                                                   |
| 6. 30 second chair stand      | Lower body strength         | Number of full stands completed in 30 seconds from a seated position                                                                                            |
| 7. Four test balance scale    | Static balance              | Number of seconds up to 10 seconds each that participant is able to sustain 1) feet together stand, 2) semi-tandem stand, 3) tandem stand and 4) one leg stand  |
| 8. 6-minute walk              | Aerobic endurance           | Number of meters that participant can walk in 6 minutes around a 45.7 meter course                                                                              |
